# Supplementary material
Source: PubMed Central journal article supplement (PMC4364385)

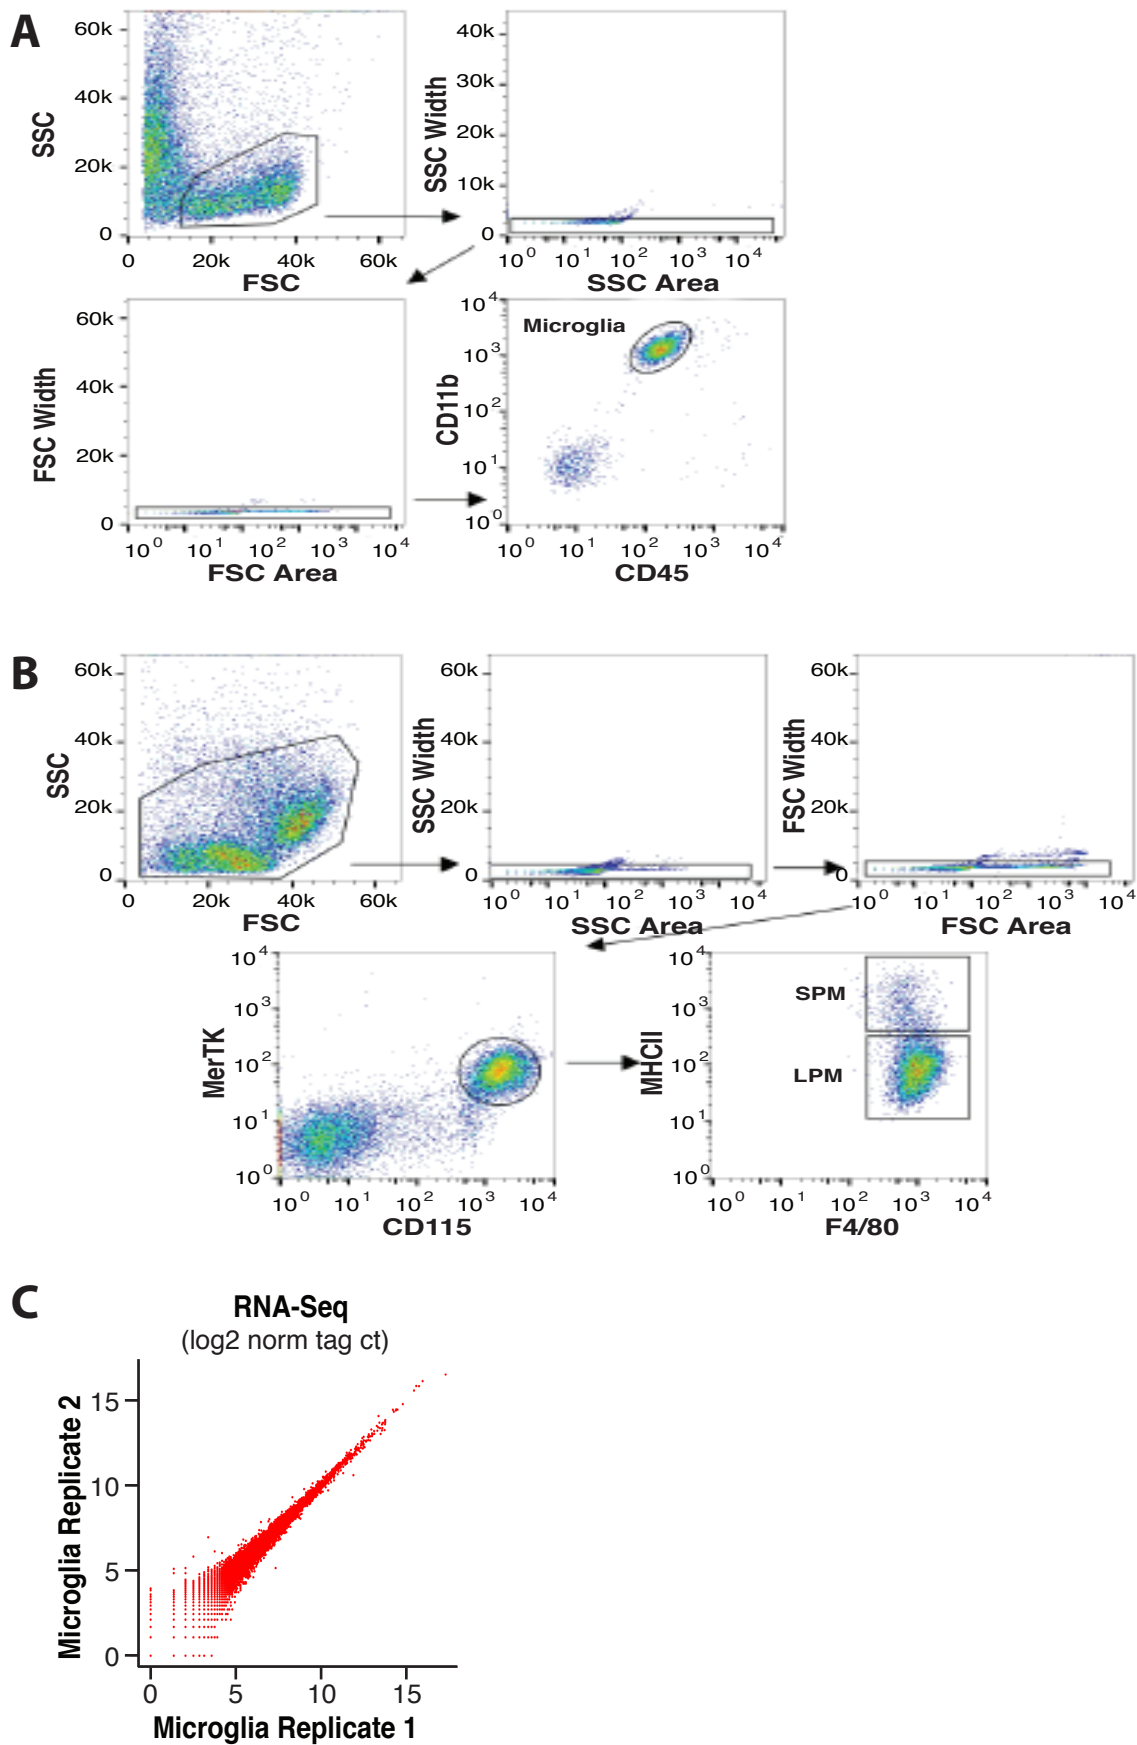

Supplement: NIHMS645413-supplement-2.pdf [file NIHMS645413-supplement-2.pdf]

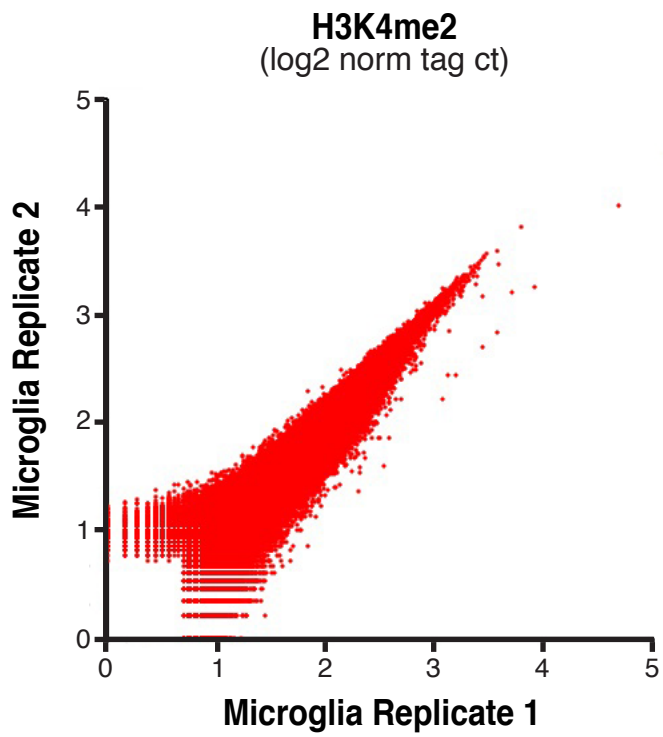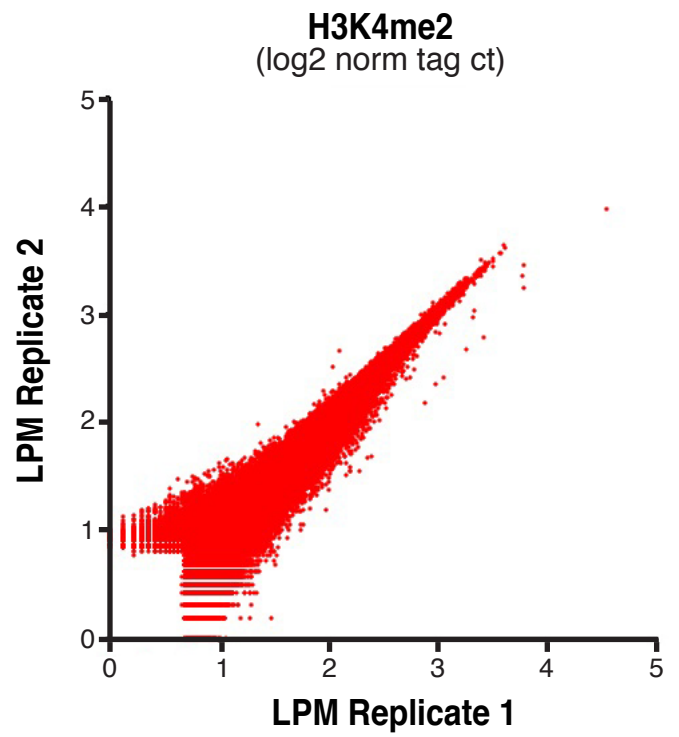

Supplement: NIHMS645413-supplement-3.pdf [file NIHMS645413-supplement-3.pdf]

**A**

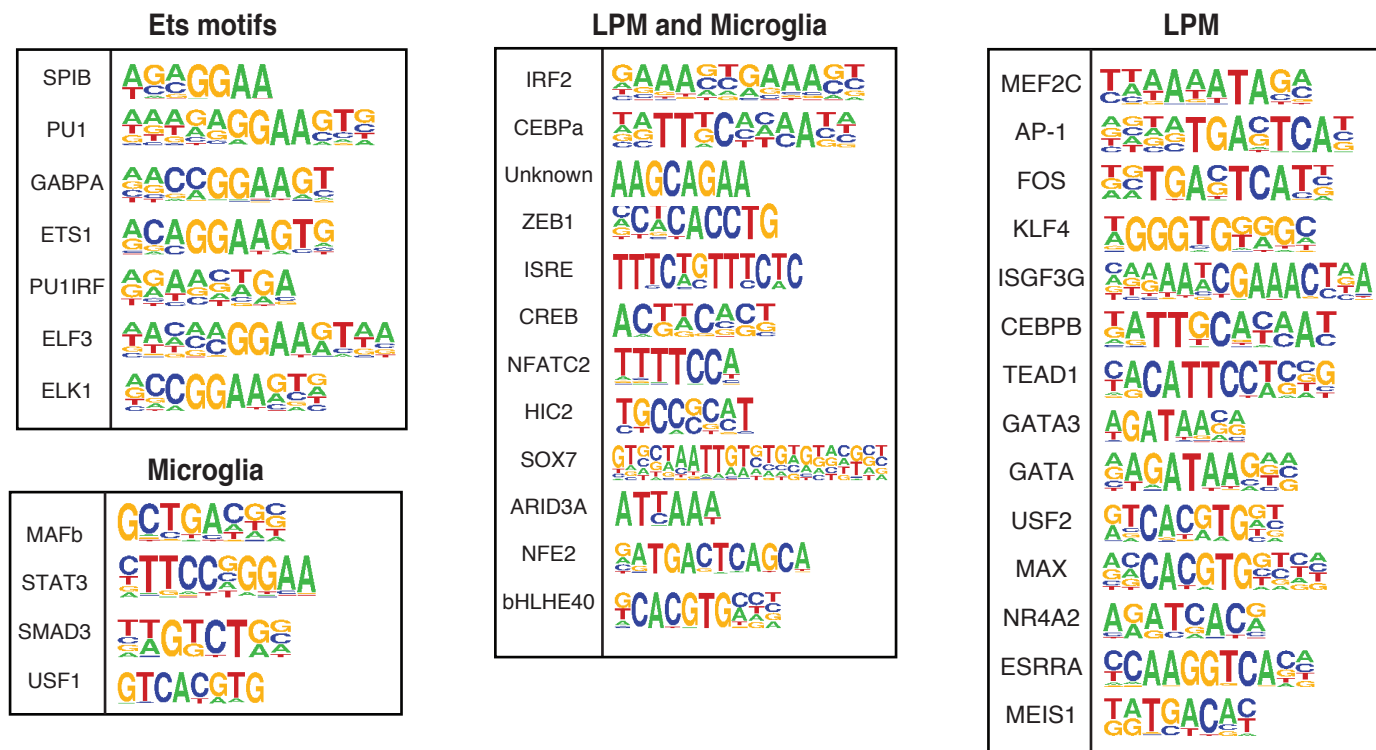

**B**

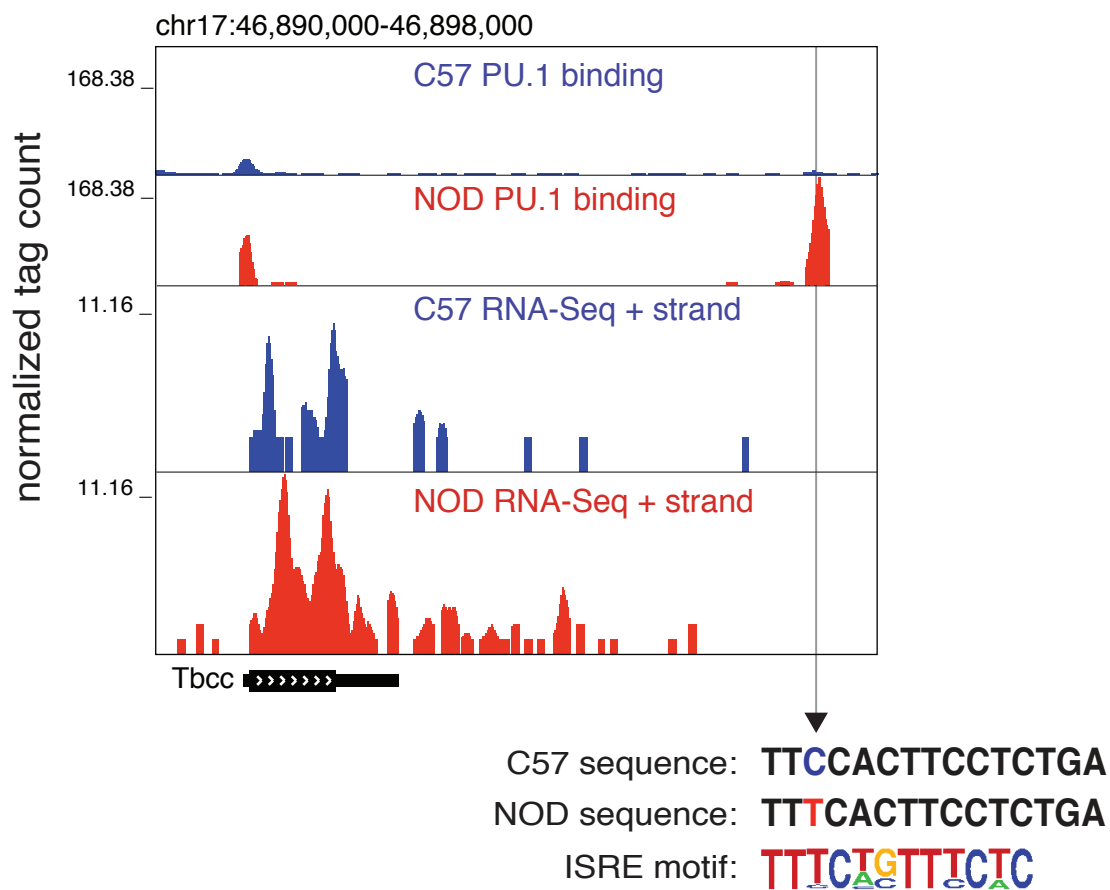

Supplement: NIHMS645413-supplement-4.pdf [file NIHMS645413-supplement-4.pdf]

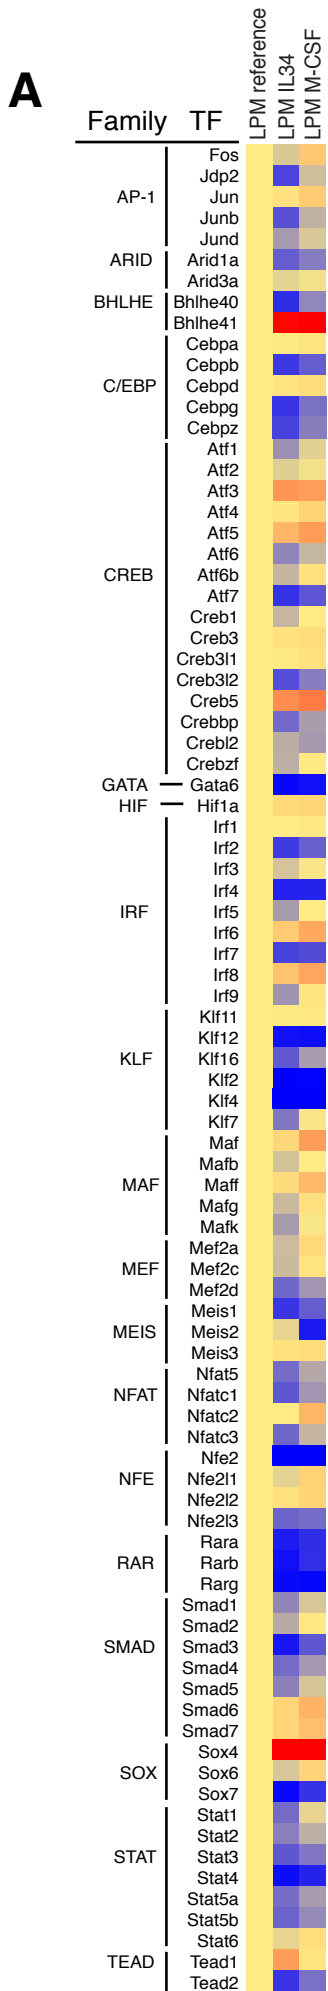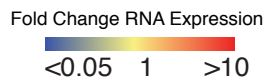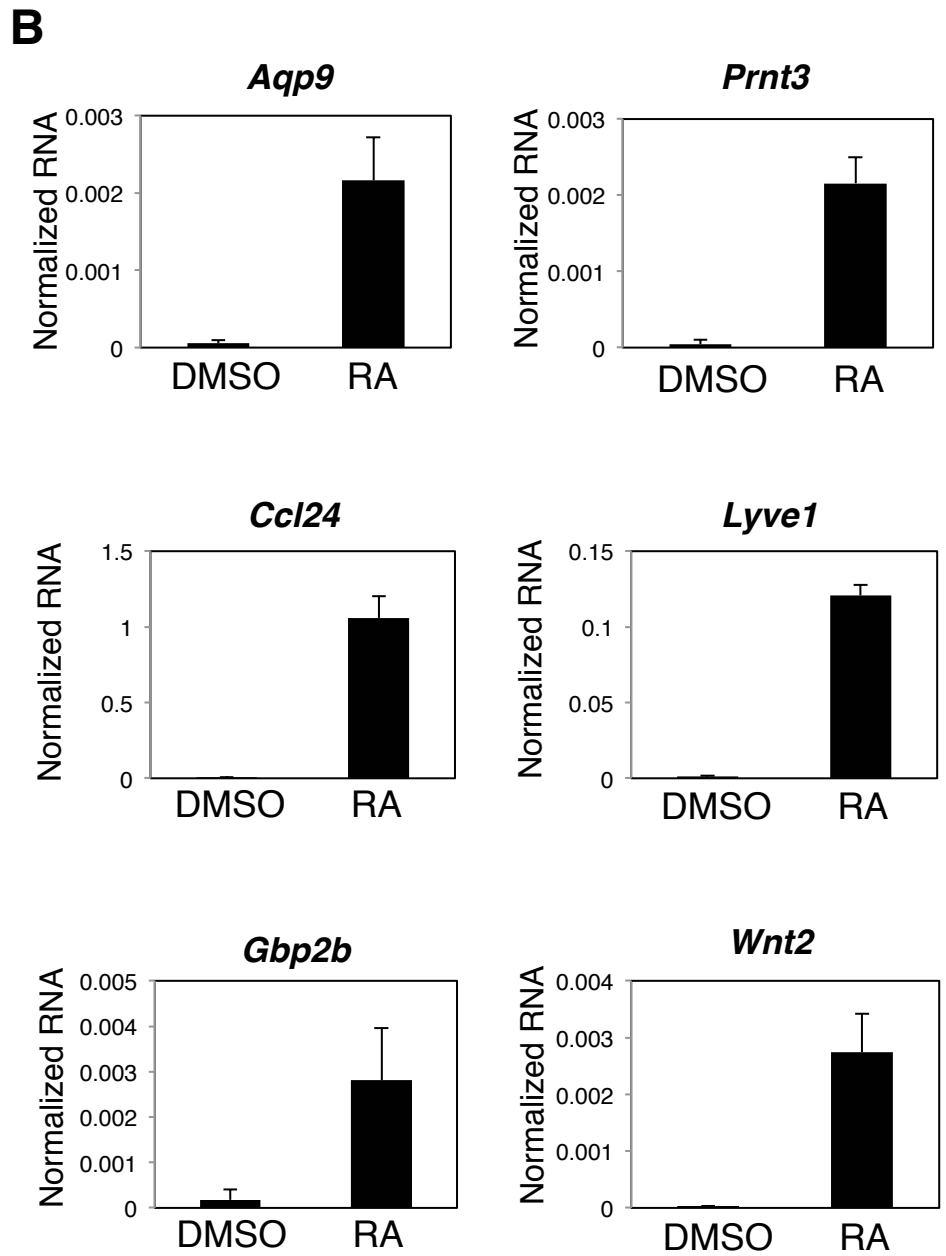

Supplement: NIHMS645413-supplement-5.pdf [file NIHMS645413-supplement-5.pdf]
